# Supplementary material for: Mechanistic insights into the inhibition of NTCP by myrcludex B
Source: PubMed Central journal article supplement — JHEP Rep. 2019 Aug 1;1(4):278–85. doi: 10.1016/j.jhepr.2019.07.006 (PMC7001544; doi:10.1016/j.jhepr.2019.07.006), 2019-08-01
Supplement: mmc1.pdf [file mmc1.pdf]

# Mechanistical insights to the inhibition of NTCP by Myrcludex B

Joanne M. Donkers, Monique D. Appelman, Stan F.J. van de Graaf

## Table of contents

|              |   |
|--------------|---|
| Fig. S1..... | 2 |
| Fig. S2..... | 3 |
| Fig. S3..... | 4 |

## Supplemental figures

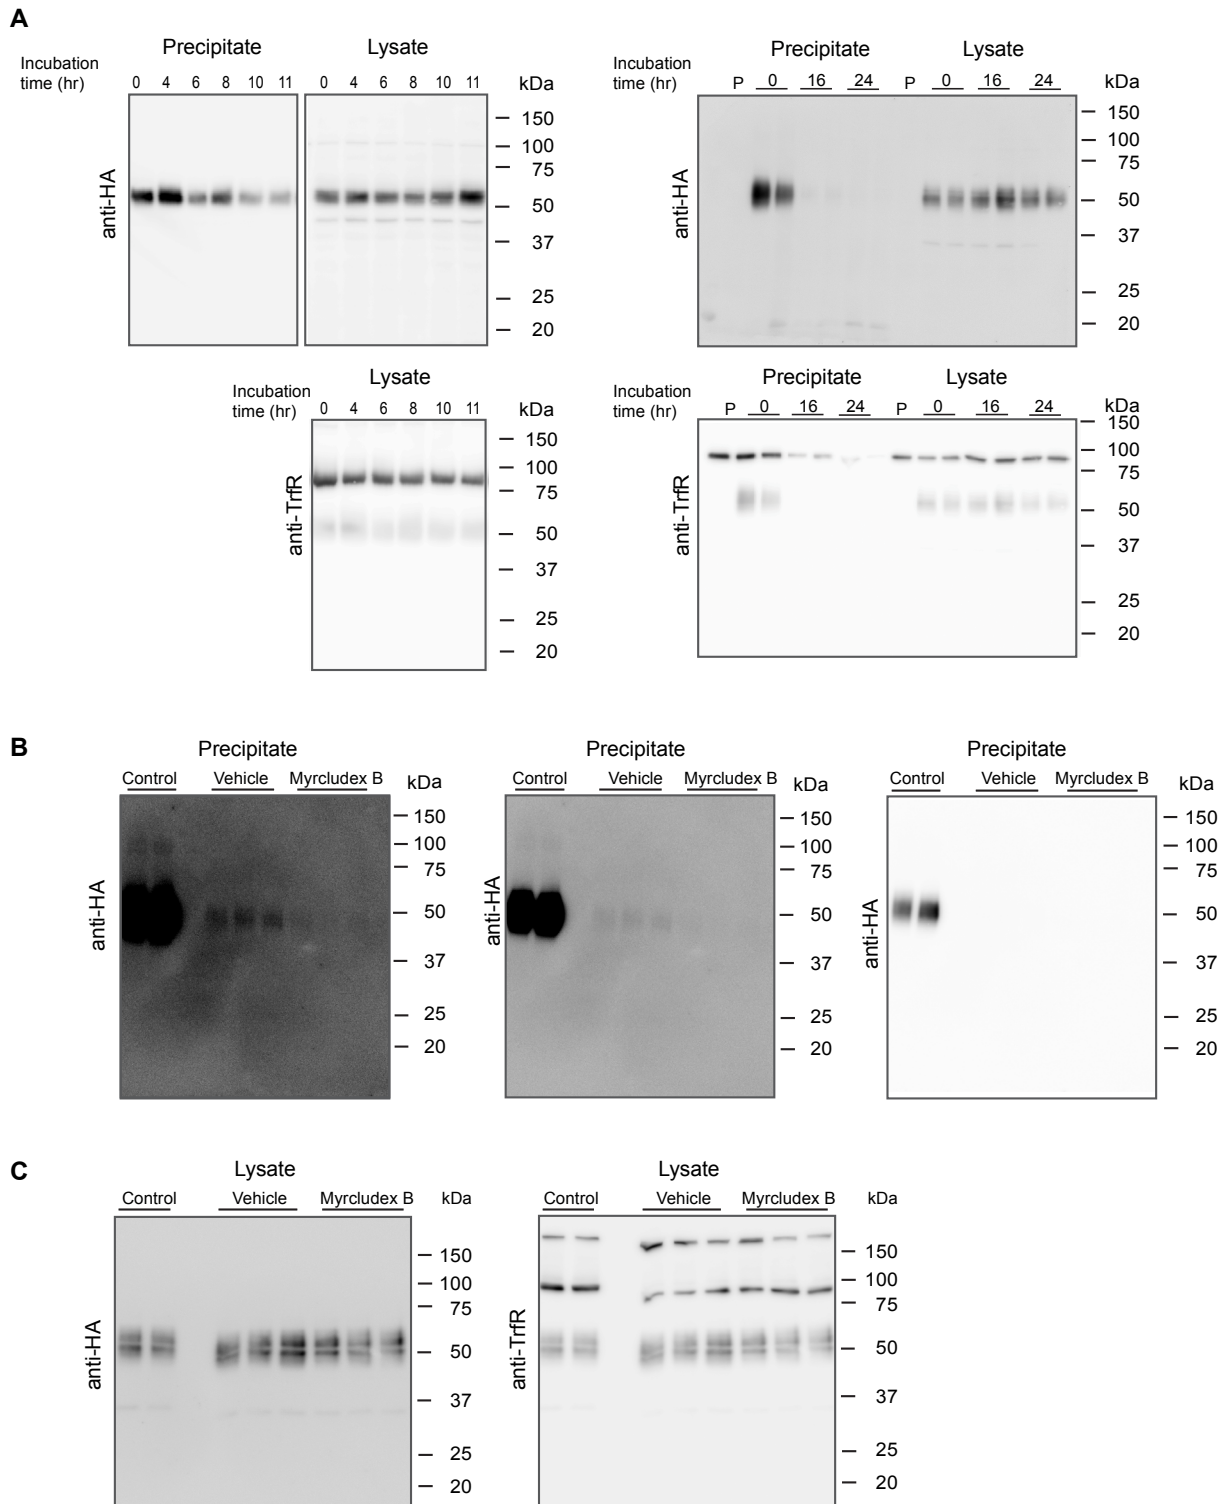

**Fig. S1. Complete uncropped western blots of Fig. 2. (A) Complete western blot of Fig. 2A showing NTCP and TrfR protein expression. (B-C) Complete western blot**

figure of Fig. 2D, (B) three different light intensities of the HA-HRP signal demonstrating NTCP protein expression in the eluate fraction. (C) lysate blot of the HA-HRP and TrfR protein expression.

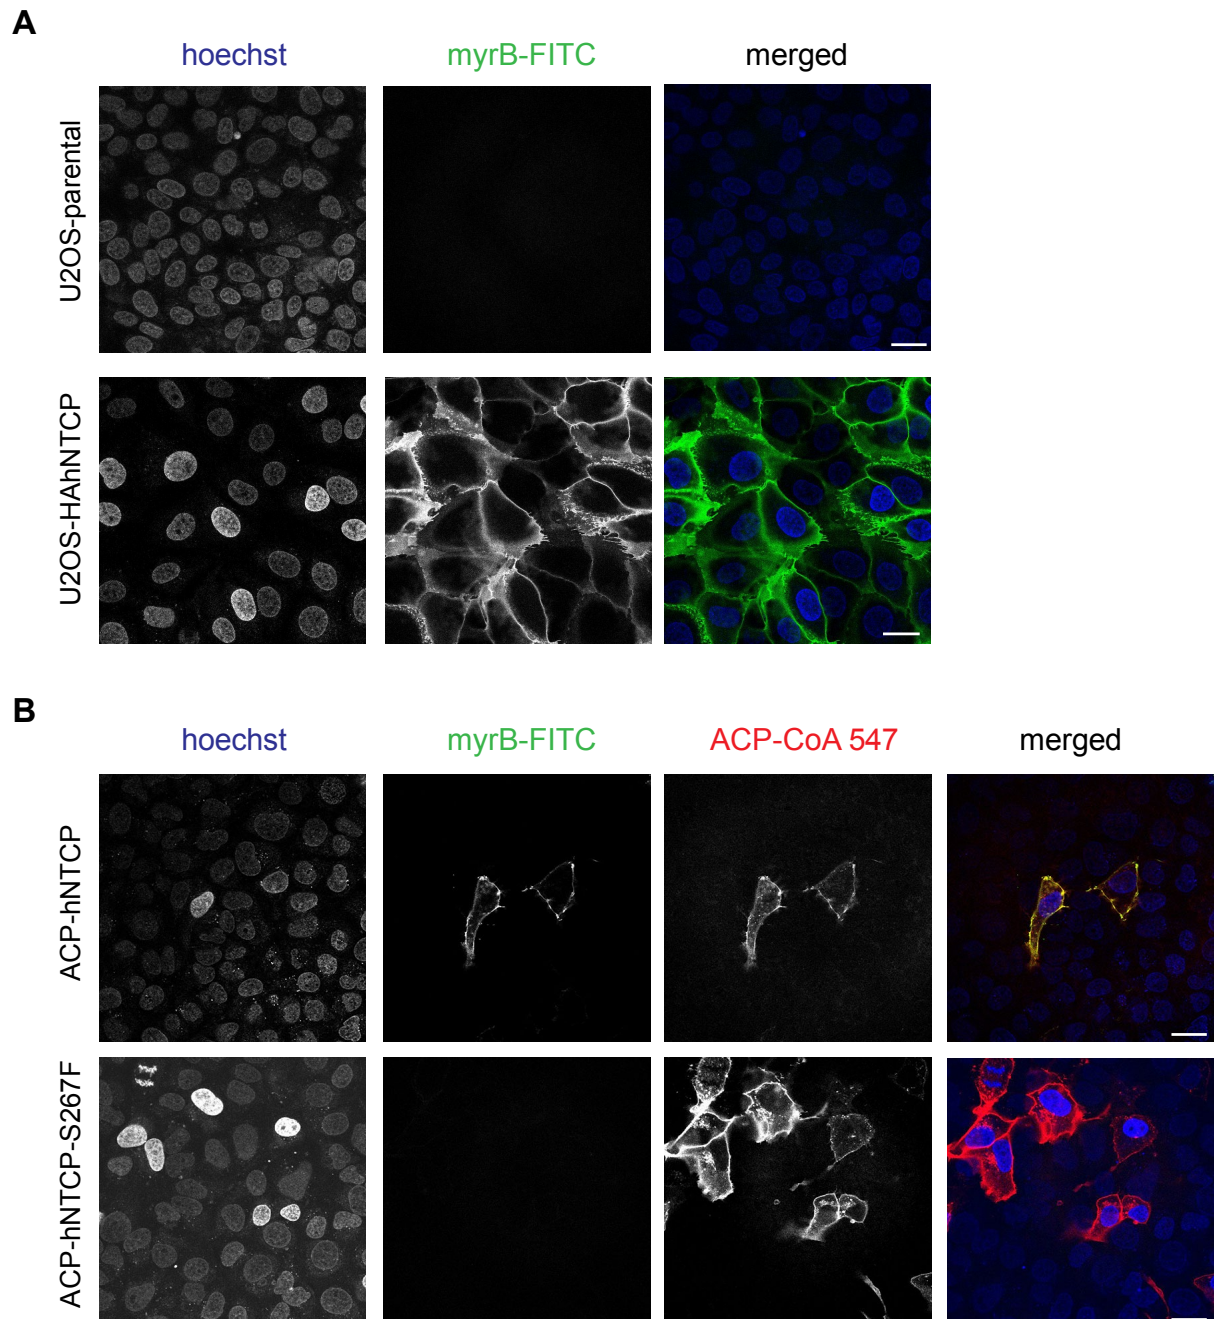

**Fig. S2. Myrcludex B-FITC binds specifically to wild type NTCP and not to NTCP-S267F mutant.** (A) Representative confocal microscopy pictures of U2OS parental and U2OS-HA-NTCP incubated with 200 nM Myrcludex B-FITC. (B) Representative confocal microscopy pictures of U2OS cells transfected with ACP-NTCP or ACP-

NTCP-S267F incubated with 200 nM Myrcludex B-FITC and labeled with ACP-CoA 547 (scale bar 25  $\mu\text{m}$  ).

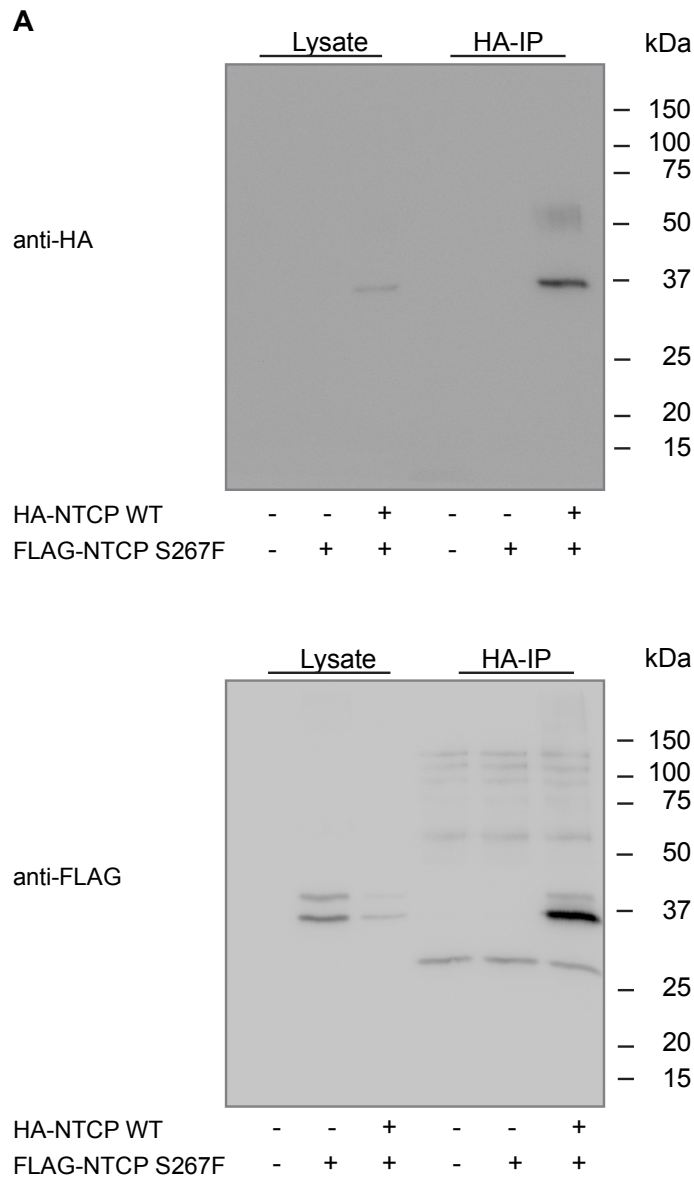

**Fig. S3. Complete uncropped Western blots of Fig. 6.** Complete western blot of Fig. 6 showing co-immunoprecipitation of U2OS parental or HA-NTCP overexpressing U2OS cells transfected with HA-NTCP-S267F. The immunoprecipitation is shown on the left and the lysate controls are shown on the right.
